# Supplementary material
Source: HighWire-hosted journal article supplement (https://erj.ersjournals.com/content/58/1/2004229)

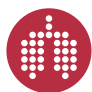

# Screening for pulmonary arterial hypertension in adults carrying a *BMPR2* mutation

SHAREABLE PDF

David Montani<sup>1,2,3,14</sup>, Barbara Girerd<sup>1,2,3,14</sup>, Xavier Jaïs<sup>1,2,3</sup>, Pierantonio Laveneziana<sup>4,5</sup>, Edmund M.T. Lau<sup>6</sup>, Amir Bouchachi<sup>3,7</sup>, Sébastien Hascoët<sup>1,2,3</sup>, Sven Günther<sup>9</sup>, Laurent Godinas<sup>1,2,3</sup>, Florence Parent<sup>1,2,3</sup>, Christophe Guignabert<sup>1,3</sup>, Antoine Beurnier<sup>3,10</sup>, Denis Chemla<sup>3,10</sup>, Philippe Hervé<sup>3,11</sup>, Mélanie Eyries<sup>12,13</sup>, Florent Soubrier<sup>12,13</sup>, Gérald Simonneau<sup>1,2,3</sup>, Olivier Sitbon<sup>1,2,3</sup>, Laurent Savale<sup>1,2,3</sup> and Marc Humbert<sup>1,2,3</sup>

<sup>1</sup>School of Medicine, Université Paris-Saclay, Le Kremlin-Bicêtre, France. <sup>2</sup>Service de Pneumologie et Soins Intensifs Respiratoires, AP-HP, Hôpital Bicêtre, Le Kremlin-Bicêtre, France. <sup>3</sup>INSERM UMRS 999, Hôpital Marie Lannelongue, Le Plessis-Robinson, France. <sup>4</sup>INSERM UMRS 1158, Neurophysiologie Respiratoire Expérimentale et Clinique, Sorbonne Université, Paris, France. <sup>5</sup>Service des Explorations Fonctionnelles de la Respiration, de l'Exercice et de la Dyspnée, Département Médico-Universitaire "APPROCHES", Hôpitaux Universitaires Pitié-Salpêtrière, Tenon et Saint-Antoine, AP-HP, Sorbonne Université, Paris, France. <sup>6</sup>Dept of Respiratory Medicine, Royal Prince Alfred Hospital, Camperdown, Australia. <sup>7</sup>Service de Cardiologie, AP-HP, Hôpital Bicêtre, Le Kremlin-Bicêtre, France. <sup>8</sup>Pôle de Cardiologie Pédiatrique et Congénitale, Hôpital Marie Lannelongue, Le Plessis-Robinson, France. <sup>9</sup>Service de Physiologie, AP-HP, Georges Pompidou European Hospital, Paris, France. <sup>10</sup>Service de Physiologie, AP-HP, Hôpital Bicêtre, Le Kremlin-Bicêtre, France. <sup>11</sup>Service de Chirurgie Thoracique, Hôpital Marie Lannelongue, Le Plessis-Robinson, France. <sup>12</sup>Département de Génétique, AP-HP, Hôpital Pitié-Salpêtrière, Paris, France. <sup>13</sup>INSERM UMRS 1166, Sorbonne Université and Institute for Cardiometabolism and Nutrition (ICAN), Paris, France. <sup>14</sup>These two authors contributed equally to this work.

Corresponding author: Marc Humbert ([marc.humbert@aphp.fr](mailto:marc.humbert@aphp.fr))

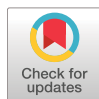

Shareable abstract (@ERSpublications)

**Asymptomatic *BMPR2* mutation carriers have a 2.3% per year risk of developing PAH. DELPHI-2 provides the platform for future international multicentre studies to refine multimodal screening algorithms in *BMPR2* mutation carriers.** <http://bit.ly/3oi2KJ1>

**Cite this article as:** Montani D, Girerd B, Jaïs X, *et al.* Screening for pulmonary arterial hypertension in adults carrying a *BMPR2* mutation. *Eur Respir J* 2021; 58: 2004229 [DOI: 10.1183/13993003.04229-2020].

This single-page version can be shared freely online.

## Abstract

**Background** Heritable pulmonary arterial hypertension (PAH) is most commonly due to heterozygous mutations of the *BMPR2* gene. Based on expert consensus, guidelines recommend annual screening echocardiography in asymptomatic *BMPR2* mutation carriers. The main objectives of this study were to evaluate the characteristics of asymptomatic *BMPR2* mutation carriers, assess their risk of occurrence of PAH and detect PAH at an early stage in this high-risk population.

**Methods** Asymptomatic *BMPR2* mutation carriers underwent screening at baseline and annually for a minimum of 2 years (DELPHI-2 study; ClinicalTrials.gov: NCT01600898). Annual screening included clinical assessment, ECG, pulmonary function tests, 6-min walk distance, cardiopulmonary exercise testing, chest radiography, echocardiography and brain natriuretic peptide (BNP) or N-terminal (NT)-proBNP level. Right heart catheterisation (RHC) was performed based on predefined criteria. An optional RHC at rest and exercise was proposed at baseline.

**Results** 55 subjects (26 males; median age 37 years) were included. At baseline, no PAH was suspected based on echocardiography and NT-proBNP levels. All subjects accepted RHC at inclusion, which identified two mild PAH cases (3.6%) and 12 subjects with exercise pulmonary hypertension (21.8%). At long-term follow-up (118.8 patient-years of follow-up), three additional cases were diagnosed, yielding a PAH incidence of 2.3% per year (0.99% per year in males and 3.5% per year in females). All PAH cases remained at low-risk status on oral therapy at last follow-up.

**Conclusions** Asymptomatic *BMPR2* mutation carriers have a significant risk of developing incident PAH. International multicentre studies are needed to confirm that refined multimodal screening programmes with regular follow-up allow early detection of PAH.

Copyright ©The authors 2021. For reproduction rights and permissions contact [permissions@ersnet.org](mailto:permissions@ersnet.org)

This article is open access and distributed under the terms of the Creative Commons Attribution Non-Commercial Licence 4.0.

This article has supplementary material available from [erj.ersjournals.com](http://erj.ersjournals.com)

This article has an editorial commentary: <https://doi.org/10.1183/13993003.00286-2021>

Received: 18 Nov 2020  
Accepted: 17 Dec 2020

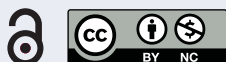

Supplement: inline-supplementary-material-2 [file inline-supplementary-material-2.pdf]
