# Supplementary material
Source: HighWire-hosted journal article supplement (https://erj.ersjournals.com/content/58/1/2004229)
Supplement: inline-supplementary-material-1 [file inline-supplementary-material-1.pdf]

## SUPPLEMENTARY METHODS

### Baseline and follow-up assessment

#### Electrocardiogram

ECG evaluated signs of possible PH including right bundle branch block, inverted T wave in the right precordial leads or right axis deviation (QRS axis  $> +90$  degrees).

#### Pulmonary function tests

All patients completed standard PFTs with spirometry, whole-body plethysmography, and diffusing lung capacity for carbon monoxide (DLCO), with measurement of alveolar volume (VA) by helium dilution technique according to the recommendations from the American Thoracic Society (ATS)/ERS guidelines.<sup>1</sup> DLCO was measured with a single breath method and a ten-second breathhold and values of DLCO were corrected for hemoglobin.<sup>1</sup>

#### Doppler echocardiography

Measurements included TRV, estimation of right atrial pressure (RAP), right atrial surface, left atrial surface, right ventricular diastolic surface, right ventricular systolic surface, right ventricular ejection fraction, tricuspid annular plane systolic excursion (TAPSE), right ventricular Tei index. Where possible, systolic PAP was estimated as  $4 \times (\text{TRV})^2 + \text{RAP}$ .

#### 6-minute walk distance and cardiopulmonary exercise test

A non-encouraged 6MWD (expressed in metres) was performed according to the ATS recommendations.<sup>2</sup> CPET was performed as recommended using an electromagnetically braked cycle ergometer during incremental test.<sup>3,4</sup> Oxygen consumption ( $\dot{V}\text{O}_2$ ),  $\text{CO}_2$  production, ventilation, and heart rate were measured breath-by-breath using the Ergocard cardiopulmonary exercise testing system® (Medisoft, Belgium). Arterial blood gases ( $\text{PaO}_2$  and  $\text{PaCO}_2$ ) at rest and at peak exercise where possible, were collected with puncture of the radial artery on room air. An investigational CPET probability score of PH was predefined based on five criteria adapted from data published by our group and others.<sup>3-8</sup> (Table 1): three criteria at peak exercise were arterial-end-tidal  $\text{PCO}_2$  difference ( $\text{P}_{\text{a-ET}}\text{CO}_2$ ), alveolar-arterial oxygen difference ( $\text{P}_{\text{(A-a)}}\text{O}_2$ ), physiologic dead space fraction ( $\text{V}_\text{D}/\text{V}_\text{T}$ ); and two criteria at anaerobic threshold were minute ventilation to carbon dioxide production ratio ( $\text{V}'\text{E}/\text{VCO}_2$ ) and end-tidal partial pressure of carbon dioxide ( $\text{P}_{\text{ET}}\text{CO}_2$ ).

### Biological tests

Biological testing included white blood cell counts, haemoglobin, electrolytes, creatinine, liver function tests, BNP at inclusion, BNP or NT-proBNP during follow-up, and uricaemia.

### Haemodynamic evaluation at rest and exercise

Haemodynamic evaluation was carried out in supine position and measurements were obtained with a balloon-tipped, double-lumen, fluid-filled 7 Fr Swan Ganz catheter via either the brachial or jugular vein approach, as previously described.<sup>9</sup> Zero reference was set at the mid-chest level.<sup>9</sup> Right atrial pressure, systolic, diastolic, and mean PAP were recorded and PawP was measured at end-expiration and end-diastole. Cardiac output (CO) was measured using the thermodilution technique (average of three values differing by <10%), cardiac index (CI) was calculated as CO/body surface area and stroke volume index (SVI) was calculated as CI/heart rate. PVR was calculated as (mPAP–PawP)/CO and total pulmonary resistance (TPR) as mPAP/CO.

Dynamic exercise was performed with subjects in supine position on an electronically braked lower limb cycle ergometer, as previously described.<sup>10,11</sup> Subjects were encouraged to cycle at a rate of 60 revolutions/min until exhaustion or appearance of exercise-limiting symptoms. Measurements were done at baseline and at the following stages: legs on cycle pedal, unloaded pedaling (0 W) and at constant workload increments of 20–30 W depending on estimated exercise capacity. Pressure measurements were averaged over the respiratory cycle and all measurements were obtained at steady state (i.e. stable mPAP and heart rate) during the last 1–2 min of each exercise step. Exercise PH was defined by an increased in mPAP >30 mmHg and total pulmonary resistance (TPR) >3 WU.<sup>10,12</sup>

## SUPPLEMENTARY TABLES

**Supplemental Table S1. Investigational cardiopulmonary exercise testing probability score of pulmonary hypertension**

| Variables                                       | Values                                     | Score |
|-------------------------------------------------|--------------------------------------------|-------|
| <b>P<sub>(a-ET)</sub>CO<sub>2</sub> at peak</b> | Negative value                             | 0     |
|                                                 | Positive value                             | 2     |
| <b>P<sub>(A-a)</sub>O<sub>2</sub> at peak</b>   | ≤29 mmHg                                   | 0     |
|                                                 | ≥30 mmHg                                   | 2     |
| <b>V'<sub>E</sub>/V'CO<sub>2</sub> at AT</b>    | ≤29                                        | 0     |
|                                                 | 30-34                                      | 1     |
|                                                 | ≥35                                        | 2     |
| <b>P<sub>ET</sub>CO<sub>2</sub> at AT</b>       | ≥36 mmHg                                   | 0     |
|                                                 | 35-31 mmHg                                 | 1     |
|                                                 | ≤30 mmHg                                   | 2     |
| <b>V<sub>D</sub>/V<sub>T</sub> at peak</b>      | decreases from baseline                    | 0     |
|                                                 | stable or decreases slightly from baseline | 1     |
|                                                 | Increases from baseline                    | 2     |

P<sub>(a-ET)</sub>CO<sub>2</sub> = arterial-end-tidal PCO<sub>2</sub> difference; P<sub>(A-a)</sub>O<sub>2</sub> = alveolar-arterial oxygen difference; V'<sub>E</sub>/V'CO<sub>2</sub> = minute ventilation to carbon dioxide production ratio; AT = anaerobic threshold; P<sub>ET</sub>CO<sub>2</sub> = end-tidal partial pressure of carbon dioxide; V<sub>D</sub>/V<sub>T</sub> = physiologic dead space fraction.

**Supplemental Table S2. List of *BMPR2* mutations in the 55 asymptomatic *BMPR2* mutations carriers**

| Family | Patient                  | Age at inclusion             | Gender           | Amino acid changes     | Protein changes        | Type of mutation    |
|--------|--------------------------|------------------------------|------------------|------------------------|------------------------|---------------------|
| 1      | 1A<br>1B                 | 37.1<br>42.8                 | F<br>M           | c.418+3A>T             | Splice defect          | Large rearrangement |
| 2      | 2A<br>2B<br>2C<br>2D     | 25.6<br>32.9<br>66.4<br>40.8 | F<br>M<br>F<br>M | c.1472G>A              | p.Arg491Gln            | Missense            |
| 3      | 3A<br>3B                 | 23.9<br>40.2                 | M<br>M           | c.1001T>G              | p.Leu334X              | Nonsense            |
| 4      | 4A                       | 60.5                         | F                | Deletion exon 11 to 13 | Deletion exon 11 to 13 | Large rearrangement |
| 5      | 5A<br>5B                 | 58.2<br>21.8                 | F<br>F           | c.1277-9A>G            | Splice defect          | Large rearrangement |
| 6      | 6A                       | 25.5                         | F                | c.1471C>T              | p.Arg491Trp            | Missense            |
| 7      | 7A                       | 32.5                         | M                | c.439C>T               | p.Arg147X              | Nonsense            |
| 8      | 8A                       | 36.8                         | F                | Deletion exon 6        | Deletion exon 6        | Large rearrangement |
| 9      | 9A<br>9B<br>9C           | 43.8<br>46.1<br>43.6         | F<br>M<br>F      | c.1771C>T              | p.Arg591X              | Nonsense            |
| 10     | 10A                      | 26.1                         | F                | c. 200A>G              | p.Tyr67Cys             | Missense            |
| 11     | 11A                      | 26.6                         | M                | c.2618G>A              | , p.Arg873Gln          | Missense            |
| 12     | 12A<br>12B<br>12C<br>12D | 25.5<br>52.3<br>53.8<br>55.3 | F<br>M<br>M<br>F | c.1171G>A              | p.Ala391Thr            | Missense            |
| 13     | 13A                      | 35.7                         | M                | c.439C>T               | p.Arg147X              | Nonsense            |
| 14     | 14A<br>14B<br>14C        | 47.5<br>38.3<br>48.8         | F<br>F<br>F      | c.1348C>T              | p.Gln450X              | Nonsense            |
| 15     | 15A<br>15B               | 27.1<br>25.6                 | F<br>F           | c.2617C>T              | p.Arg873X              | Nonsense            |
| 16     | 16A                      | 51.0                         | F                | c.928A>T               | p.Arg310X              | Nonsense            |
| 17     | 17A                      | 67.5                         | M                | c.1472G>A              | p.Arg491Gln            | Missense            |
| 18     | 18A                      | 46.4                         | M                | c.528delA              | Gly177GlnfsX10         | Nonsense            |
| 19     | 19A<br>19B<br>19C        | 65.0<br>36.0<br>18.0         | F<br>F<br>M      | c.1019T>C              | p.Leu340Pro            | Missense            |
| 20     | 20A                      | 44.0                         | F                | Deletion exon 10       | Deletion exon 10       | Large rearrangement |
| 21     | 21A                      | 63.1                         | M                | c.994C>T               | p.Arg332X              | Nonsense            |
| 22     | 22A                      | 58.0                         | M                | c.830T>C               | p.Leu277Pro            | Missense            |
| 23     | 23A<br>23B<br>23C<br>23D | 54.5<br>78.1<br>18.4<br>24.3 | F<br>F<br>F<br>M | c.961C>T               | p.Arg321X              | Nonsense            |
| 24     | 24A<br>24B               | 24.2<br>26.4                 | F<br>M           | c.1471C>T              | p.Arg491Trp            | Missense            |
| 25     | 25A                      | 21.4                         | F                | Deletion exon 2        | Deletion exon 2        | Large rearrangement |
| 26     | 26A<br>26B<br>26C<br>26D | 48.6<br>23.2<br>22.7<br>18.6 | M<br>M<br>M<br>M | c.2308del              | p.Arg770GlnfsX2        | Nonsense            |
| 27     | 27A                      | 49.2                         | M                | c.872T>G               | p.Leu291X              | Nonsense            |
| 28     | 28A                      | 18.0                         | F                | c.968-1G>T             | Splice defect          | Large rearrangement |
| 29     | 29A                      | 59.2                         | F                | c.642T>G               | p.Tyr214X              | Nonsense            |
| 30     | 30A                      | 22.6                         | M                | c.435del               | p.Phe145Leufs*7        | Nonsense            |
| 31     | 31A<br>31B               | 22.3<br>26.2                 | M<br>M           | c.901T>C               | p.Ser301Pro            | Missense            |

**Supplemental Table S3. Characteristics of *BMP2* mutations carriers (n=55)**

| <i>Demographic data</i>                            |                                |
|----------------------------------------------------|--------------------------------|
| Age, years                                         | 37.1 (18-78.1) [25.5-55.6]     |
| Gender, M/F                                        | 26/29                          |
| Tobacco exposure >5p.y                             | 19 (35%)                       |
| BMI, Kg/m <sup>2</sup>                             | 22.5 (16.8-32.2) [21.9-26.0]   |
| Systemic hypertension, n (%)                       | 11 (20%)                       |
| Diabetes, n (%)                                    | 4 (7%)                         |
| Dyslipidemia, n (%)                                | 3 (5%)                         |
| <i>Functional parameters</i>                       |                                |
| 6MWD, m                                            | 533 (368-693) [479-599]        |
| FEV1, % pred                                       | 105 (69-152) [97-113]          |
| FVC, % pred                                        | 108 (75-162) [97-118]          |
| DLCO, % pred                                       | 76 (39-126) [69-87]            |
| DLCO/Va, % pred                                    | 88 (49-126) [73-99]            |
| <i>Cardiopulmonary exercise testing</i>            |                                |
| V'O <sub>2</sub> at peak, % pred                   | 81 (47-132) [66-90]            |
| V'E at peak, % pred                                | 74.8 (37.8-156.8) [56.6-101.4] |
| V <sub>D</sub> /V <sub>T</sub> , %                 | 0.21 (0.06-0.39) [0.12-0.25]   |
| V'E/VCO <sub>2</sub> at AT                         | 33 (24-66) [23-44]             |
| VO <sub>2</sub> /HRF, % pred                       | 88.5 (50-125) [78-100]         |
| PaO <sub>2</sub> at rest, mmHg                     | 93 (70-118) [85-100]           |
| PaO <sub>2</sub> at peak, mmHg                     | 106 (85-124) [97-114]          |
| P <sub>(A-a)</sub> O <sub>2</sub> , mmHg           | 13.8 (-5.6-32.8) [7.8-20.0]    |
| <i>Echocardiography</i>                            |                                |
| TRV, m/s                                           | 2 (1.5-2.75) [1.9-2.3] (n=30)  |
| RA surface area, cm <sup>2</sup>                   | 13 (7.7-27) [10.0-15.0]        |
| LA Surface area, cm <sup>2</sup>                   | 14 (9.5-23) [13.0-17.0]        |
| Diastolic RV, cm <sup>2</sup>                      | 16.9 (8-28) [14.2-20.0]        |
| Systolic RV, cm <sup>2</sup>                       | 9.5 (3.7-15) [7.1-11.0]        |
| RVEF, %                                            | 45 (30-71) [40-50]             |
| TAPSE, mm                                          | 23 (16-28) [21-25]             |
| RV Tei index                                       | 0.24 (0.06-0.77) [0.18-0.0]    |
| <i>Hemodynamics</i>                                |                                |
| mPAP, mmHg                                         | 15 (8-26) [13-18]              |
| PawP, mmHg                                         | 8 (2-14) [6-10]                |
| Cardiac output, L.min <sup>-1</sup>                | 6.03 (3.77-10.33) [5.25-7.02]  |
| Cardiac index, L.min <sup>-1</sup> .m <sup>2</sup> | 3.50 (3.07-4.10)               |
| Stroke volume index, mL.m <sup>2</sup>             | 51.6 (33.7-79.2) [43.6-53.5]   |
| TPR, WU                                            | 2.5 (1.2-6.2) [1.9-3.0]        |
| PVR, WU                                            | 1.0 (0.2-4.4) [0.7-1.5]        |
| <i>Biologic tests</i>                              |                                |
| Uricemia, μmol.L <sup>-1</sup> (normal < 357)      | 286 (170-528) [234-383]        |
| BNP, ng.L <sup>-1</sup> (normal < 80)              | 11 (5-60) [9-17]               |

All values are expressed as Median (Min-Max) [IQR 25-75]

AT: anaerobic threshold; *BMP2*: bone morphogenetic protein receptor type 2; DLCO : diffusing capacity for carbon monoxide; DLCO/Va: diffusing capacity for carbon monoxide divided by the alveolar volume; FEV1: Forced Expiratory Volume in the first second; FVC: forced vital capacity; HR: heart rate; LA: left atrium; NYHA FC: New York Heart Association functional class, PAH: pulmonary arterial hypertension, mPAP= mean pulmonary artery pressure, PaO<sub>2</sub>: partial pressure of oxygen in arterial blood; PawP: pulmonary capillary wedge pressure; P<sub>(A-a)</sub>O<sub>2</sub>: alveolar-arterial oxygen difference; PVR: pulmonary vascular resistance; RA: right atrium;

*RAP: right atrial pressure; RV: right ventricle; RVEF: right ventricular ejection fraction; TAPSE: tricuspid annular plane systolic excursion; TPR: total pulmonary resistance; TRV: Tricuspid regurgitation velocity;  $V_D/V_T$ : physiologic dead space fraction;  $V'_E$ : minute ventilation;  $V'O_2$ : oxygen consumption corrected for body weight; 6MWD: 6-minute walk distance; ; % pred : percentage of predicted values.*

## REFERENCES

- 1 2017 ERS/ATS standards for single-breath carbon monoxide uptake in the lung. - PubMed - NCBI. <https://www.ncbi.nlm.nih.gov/pubmed/?term=28049168> (accessed Oct 31, 2019).
- 2 ATS Committee on Proficiency Standards for Clinical Pulmonary Function Laboratories. ATS statement: guidelines for the six-minute walk test. *Am J Respir Crit Care Med* 2002; **166**: 111–7.
- 3 Laveneziana P, Garcia G, Joureau B, *et al.* Dynamic respiratory mechanics and exertional dyspnoea in pulmonary arterial hypertension. *Eur Respir J* 2013; **41**: 578–87.
- 4 Laveneziana P, Humbert M, Godinas L, *et al.* Inspiratory muscle function, dynamic hyperinflation and exertional dyspnoea in pulmonary arterial hypertension. *Eur Respir J* 2015; **45**: 1495–8.
- 5 Weatherald J, Sattler C, Garcia G, Laveneziana P. Ventilatory response to exercise in cardiopulmonary disease: the role of chemosensitivity and dead space. *Eur Respir J* 2018; **51**. DOI:10.1183/13993003.00860-2017.
- 6 Yasunobu Y, Oudiz RJ, Sun X-G, Hansen JE, Wasserman K. End-tidal PCO<sub>2</sub> abnormality and exercise limitation in patients with primary pulmonary hypertension. *Chest* 2005; **127**: 1637–46.
- 7 Higashi A, Dohi Y, Yamabe S, *et al.* Evaluation of end-tidal CO<sub>2</sub> pressure at the anaerobic threshold for detecting and assessing pulmonary hypertension. *Heart Vessels* 2017; **32**: 1350–7.
- 8 Farina S, Bruno N, Agalbato C, *et al.* Physiological insights of exercise hyperventilation in arterial and chronic thromboembolic pulmonary hypertension. *Int J Cardiol* 2018; **259**: 178–82.
- 9 Galiè N, Humbert M, Vachiery J-L, *et al.* 2015 ESC/ERS Guidelines for the diagnosis and treatment of pulmonary hypertension: The Joint Task Force for the Diagnosis and Treatment of Pulmonary Hypertension of the European Society of Cardiology (ESC) and the European Respiratory Society (ERS): Endorsed by: Association for European Paediatric and Congenital Cardiology (AEPC), International Society for Heart and Lung Transplantation (ISHLT). *Eur Respir J* 2015; **46**: 903–75.
- 10 Herve P, Lau EM, Sitbon O, *et al.* Criteria for diagnosis of exercise pulmonary hypertension. *Eur Respir J* 2015; **46**: 728–37.
- 11 Kovacs G, Herve P, Barbera JA, *et al.* An official European Respiratory Society statement: pulmonary haemodynamics during exercise. *Eur Respir J* 2017; **50**. DOI:10.1183/13993003.00578-2017.
- 12 Simonneau G, Montani D, Celermajer DS, *et al.* Haemodynamic definitions and updated clinical classification of pulmonary hypertension. *Eur Respir J* 2018; published online Dec 13. DOI:10.1183/13993003.01913-2018.
